# Supplementary material
Source: PubMed Central journal article supplement (PMC7808759)
Supplement: NIHMS1632680-supplement-Supplemental.pdf [file NIHMS1632680-supplement-Supplemental.pdf]

Supplemental online content for:

## **Derivation and Validation of a Risk Assessment Model for Immunomodulatory Drug–Associated Thrombosis Among Patients With Multiple Myeloma**

Ang Li, MD; Qian Wu, PhD; Suhong Luo, MS; Greg S. Warnick; Neil A. Zakai, MD; Edward N. Libby, MD; Brian F. Gage, MD, MSc; David A. Garcia, MD; Gary H. Lyman, MD, MPH; and Kristen M. Sanfilippo, MD, MPHS

*J Natl Compr Canc Netw* 2019;17(7):840–847

**eTable 1:** Administrative Claims Codes Search Matrix

**eTable 2:** Administrative Claims Codes: Outcomes and Comorbidities

**eTable 3:** Administrative Claims Codes for Medications and Chemotherapy

**eTable 4:** Univariate Analysis of Risk Factors Associated With VTE in Derivation Cohort

**eTable 5:** Comparison of Cohorts in the SEER-Medicare Database

**eTable 1. Administrative Claims Codes Search Matrix**

|        | ICD-9-CM Diagnosis Codes <sup>b</sup>    | ICD-9-CM Procedure Codes | CPT4/HCPCS | NDC    | Comment                                                                             |
|--------|------------------------------------------|--------------------------|------------|--------|-------------------------------------------------------------------------------------|
| MedPAR | ADMDXCDE<br>DGN_CD1–DGN_CD25             | SRGCDE1–SRGCDE25         |            |        | To remove SNF claims, drop if SNFIND=N                                              |
| OUTPAT | DGN_CD1–DGN_CD25                         | PRCDR_CD1–PRCDR_CD13     | HCPCS      | IDENDC | Drop denied claims                                                                  |
| NCH    | PDGNS_CD<br>DGN_CD1–DGN_CD12<br>LINEDIAG |                          | HCPCS      |        | Drop denied claims                                                                  |
| DME    | PDGNS_CD<br>DGN_CD1–DGN_CD12<br>LINEDIAG |                          | HCPCS      | NDC_CD | Use for chemotherapy/drug but not for comorbidity or outcomes<br>Drop denied claims |
| PDE    |                                          |                          |            | GNN    |                                                                                     |

Abbreviations: CPT4, Current Procedural Terminology, 4th edition; DME, durable medical equipment; HCPCS, Healthcare Common Procedure Coding System; MEDPAR, Medicare Provider Analysis and Review; NCH, National Claims History (carrier claims); NDC, National Drug Code; OUTPAT, outpatient claims; PDE, Medicare Part D Prescription Drug Event; SNF, skilled nursing facility; VTE, venous thromboembolism.

**eTable 2. Administrative Claims Codes: Outcomes and Comorbidities**

|                                                                     |                                                                                                                                                                                                                   |
|---------------------------------------------------------------------|-------------------------------------------------------------------------------------------------------------------------------------------------------------------------------------------------------------------|
| VTE outcome (day 7+ look-forward window) <sup>1,2</sup>             |                                                                                                                                                                                                                   |
| Pulmonary embolism                                                  | ICD-9-CM diagnosis: 415.11, 415.12, 415.13, 415.19                                                                                                                                                                |
| Deep vein thrombosis                                                | ICD-9-CM diagnosis: 453.2, 453.40, 453.41, 453.42, 453.8, 453.82, 453.83, 453.84, 453.85, 453.86, 453.87, 453.89, 453.9                                                                                           |
| Phlebitis                                                           | ICD-9-CM diagnosis: 451.11, 451.19, 451.2, 451.81, 451.83, 451.84, 451.89, 451.9                                                                                                                                  |
| NCI Comorbidity Index (365-day lookback window) <sup>3</sup>        |                                                                                                                                                                                                                   |
| Myocardial infarction                                               | ICD-9-CM diagnosis: 410.xx with inpatient length of stay >2 d; ICD-9-CM diagnosis: 412.bb                                                                                                                         |
| Congestive heart failure                                            | ICD-9-CM diagnosis: 398.91, 425.4x–425.5x, 425.7x–425.9x, 428.xx                                                                                                                                                  |
| Paralysis/Immobilization                                            | ICD-9-CM diagnosis: 342.xx, 344.0x–344.6x, 344.9x                                                                                                                                                                 |
| Diabetes                                                            | ICD-9-CM diagnosis: 250.bb, 250.0x–250.3x, 250.4x–250.9x, 362.0x                                                                                                                                                  |
| Renal disease                                                       | ICD-9-CM diagnosis: 403.01, 403.11, 403.91, 404.02, 404.03, 404.12, 404.13, 404.92, 404.93, 582.xx–583.xx, 585.xx–586.xx, 588.xx, V42.0x, V45.1x, V56.xx<br>ICD-9-CM procedure: 39.27, 39.42, 39.95, 54.98, 55.69 |
| Liver disease                                                       | ICD-9-CM diagnosis: 070.22–070.23, 070.32–070.33, 070.44, 070.54, 456.0x–456.2x, 571.2x, 571.4x–571.6x, 572.2x–572.8x, V42.7x<br>ICD-9-CM procedure: 39.1b, 42.91, 50.5x                                          |
| Elixhauser comorbidity index (365-day lookback window) <sup>4</sup> |                                                                                                                                                                                                                   |
| Cardiac arrhythmias                                                 | ICD-9-CM diagnosis: 426.10, 426.11, 426.13, 426.2–426.53, 426.6–426.8, 427.0, 427.2, 427.31, 427.60, 427.9, 785.0, V45.0, V53.3                                                                                   |
| Hypertension                                                        | ICD-9-CM diagnosis: 401.1, 401.9, 402.10, 402.90, 404.10, 404.90, 405.1, 405.9                                                                                                                                    |
| Coagulopathy                                                        | ICD-9-CM diagnosis: 286.x, 287.1, 287.3–287.5                                                                                                                                                                     |
| Anemia                                                              | ICD-9-CM diagnosis: 280.0, 280.1–281.9, 285.9                                                                                                                                                                     |
| Obesity                                                             | ICD-9-CM diagnosis: 278.0                                                                                                                                                                                         |
| VTE-specific risk factors (365-day lookback window unless stated)   |                                                                                                                                                                                                                   |
| Central venous catheter <sup>5</sup>                                | ICD-9-CM diagnosis: 38.97<br>CPT4: 36555–36558, 36560–36561, 36563, 36565–36566, 36568–36571, 36575–36576, 36578, 36580–36585, 36597–36598                                                                        |
| Sepsis (90-day lookback window <sup>6</sup> )                       | ICD-9-CM diagnosis: 003.1, 020.2, 022.3, 036.2, 038.x, 054.5, 449, 785.52, 785.5x, 790.7, 995.91, 995.92                                                                                                          |

(continued on next page)

Abbreviations: CPT4, Current Procedural Terminology, version 4; HCPCS, Healthcare Common Procedure Coding System; VTE, venous thromboembolism.

**eTable 2. Administrative Claims Codes: Outcomes and Comorbidities (cont.)**

VTE-specific risk factors (365-day lookback window unless stated) (cont.)

Surgery (90-day lookback window<sup>5</sup>):

ICD-9-CM diagnosis: V67.0x

ICD-9-CM procedure: 00.7x, 00.8x, 03.4, 03.5x, 03.9x, 79.85, 79.86, 80.45, 80.46, 80.6, 80.85, 80.86, 80.95, 80.96, 81.40, 81.42, 81.43, 81.51, 81.52, 81.53, 81.54, 81.55, 84.16, 84.18

CPT4: 01214–01215, 01402, 20930–20938, 22010–22015, 22100–22116, 22206–22226, 22318–22328, 22532–22534, 22548–22585, 22590–22632, 22800–22819, 22830, 22840–22865, 27075–27079, 27130–27138, 27218, 27226–27228, 27253, 27258–27259, 27299, 27447, 27486–27487, 29861–29863, 43644–43645, 43800–43881, 49570–49575, 50010–50045, 50070, 50100–50135, 50205–50290, 50320–50340, 50370, 50382–50384, 50400–50540, 50593, 50600–50630, 50650–50660, 50700–50940, 51020–51040, 51080, 53000–53085, 53210–53275, 53400–53520, 53855, 56620–56740, 56800–56810, 57000–57335, 57530–57556, 57720, 58140–58146, 58150–58294, 58400–58540, 58600–58615, 58700–58720, 58750–58770, 58820–58825, 58920–58960, 58999, 61320–61321, 61546, 61680–61692, 61697–61710, 62160–62165, 63001–63017, 63045–63051, 63055–63066, 63075–63091, 63101–63103, 63170–63200, 63250–63295, 63300–63308, 63650–63688

HCPCS: S2083, S2213

Traumatic injury (90-day lookback window<sup>6</sup>):

ICD-9-CM diagnosis: 800–959, except 905–909, 930–939

Personal history of VTE (183- to 365-day lookback window)

ICD-9-CM diagnosis: V12.51, V12.52, V12.55; 415.x, 451.x, 453.x

Personal history of bleeding<sup>7</sup>

ICD-9-CM diagnosis: 423.00, 430.00, 431.00, 432.00, 432.1, 432.9, 455.20, 455.50, 455.80, 459.00, 456.00, 456.20, 530.70, 530.80, 531.00, 531.01, 531.20, 531.21, 531.40, 531.41, 531.60, 531.61, 532.00, 532.01, 532.20, 532.21, 532.40, 532.41, 532.60, 532.61, 533.00, 533.01, 533.20, 533.21, 533.40, 533.41, 533.60, 533.61, 534.00, 534.01, 534.20, 534.21, 534.40, 534.41, 534.60, 534.61, 535.01, 535.11, 535.21, 535.31, 535.41, 535.51, 535.61, 537.80, 562.02, 562.03, 562.12, 568.81, 569.30, 569.85, 578.00, 578.10, 578.90, 593.81, 599.70, 623.80, 626.20, 626.60, 719.10, 719.11, 719.12, 719.13, 719.14, 719.15, 719.16, 719.17, 719.18, 784.70, 784.80, 786.30

Abbreviations: CPT4, Current Procedural Terminology, version 4; HCPCS, Healthcare Common Procedure Coding System; VTE, venous thromboembolism.

## References

1. Lyman GH, Eckert L, Wang Y, et al. Venous thromboembolism risk in patients with cancer receiving chemotherapy: a real-world analysis. *Oncologist* 2013;18:1321–1329.
2. White RH, Garcia M, Sadeghi B, et al. Evaluation of the predictive value of ICD-9-CM coded administrative data for venous thromboembolism in the United States. *Thromb Res* 2010;126:61–67.
3. National Cancer Institute. NCI comorbidity index overview. Available at: <https://healthcaredelivery.cancer.gov/seermedicare/considerations/comorbidity.html>. Accessed May 15, 2018.
4. Elixhauser A, Steiner C, Harris DR, et al. Comorbidity measures for use with administrative data. *Med Care* 1998;36:8–27.
5. Chrischilles EA, Winiecki SK, Carnahan RM, et al. Thromboembolic events after immunoglobulin administration. Available at: <https://www.sentinelinitiative.org/vaccines-blood-biologics/assessments/thromboembolic-events-after-immunoglobulin-administration>. Accessed May 15, 2018.
6. Barell V, Aharonson-Daniel L, Fingerhut LA, et al. An introduction to the Barell body region by nature of injury diagnosis matrix. *Inj Prev* 2002;8:91–96.
7. Amason T, Wells PS, van Walraven C, et al. Accuracy of coding for possible warfarin complications in hospital discharge abstracts. *Thromb Res* 2006;118:253–262.

**eTable 3. Administrative Claims Codes for Medications and Chemotherapy**

|                                                                                                                                                                                                                                                                                                                                                                                                                                                                                                                  |
|------------------------------------------------------------------------------------------------------------------------------------------------------------------------------------------------------------------------------------------------------------------------------------------------------------------------------------------------------------------------------------------------------------------------------------------------------------------------------------------------------------------|
| Concurrent chemotherapy $\pm$ 30 d <sup>1</sup>                                                                                                                                                                                                                                                                                                                                                                                                                                                                  |
| ICD-9 procedure: injection/infusion chemotherapy/immunotherapy (99.25, 99.28)                                                                                                                                                                                                                                                                                                                                                                                                                                    |
| CPT4: injection/infusion chemotherapy (96401–96417), intra-arterial chemotherapy (96420–96425), other injection/infusion chemotherapy (96440–96549)                                                                                                                                                                                                                                                                                                                                                              |
| NDC: melphalan, cyclophosphamide, etoposide                                                                                                                                                                                                                                                                                                                                                                                                                                                                      |
| HCPCS: chemotherapy infusion (Q0083–Q0085), melphalan (J8600, J9245), bendamustine (J9033, J9034, C9243), vincristine (J9370, J9371, J9375, J9380), cyclophosphamide (J8530, J9070, J9080, J9090, J9091–J9097, C9420, C9421), etoposide (J8560, J9181, J9182, C9414, C9425), carboplatin (J9045), cisplatin (J9060, J9062, C9418), mitoxantrone (J9293), daunorubicin (J9150, J9151, C9424), idarubicin (J9211, C9429), doxorubicin (J9000, J9001, J9002, Q2048, Q2049, Q2050, C9415), bortezomib (J9041, C9207) |
| Concurrent erythropoietin $\pm$ 30 d <sup>1</sup>                                                                                                                                                                                                                                                                                                                                                                                                                                                                |
| GNN: darbepoetin alfa, epoetin alfa                                                                                                                                                                                                                                                                                                                                                                                                                                                                              |
| NDC: darbepoetin, epoetin                                                                                                                                                                                                                                                                                                                                                                                                                                                                                        |
| HCPCS: Q4081, J0881, J0882, J0885, J0886                                                                                                                                                                                                                                                                                                                                                                                                                                                                         |
| Concurrent dexamethasone $\pm$ 30 d                                                                                                                                                                                                                                                                                                                                                                                                                                                                              |
| GNN: dexamethasone                                                                                                                                                                                                                                                                                                                                                                                                                                                                                               |
| Concurrent anticoagulant <30 d to >7 d                                                                                                                                                                                                                                                                                                                                                                                                                                                                           |
| GNN: enoxaparin, dalteparin, tinzaparin, fondaparinux, heparin, warfarin, dabigatran, rivaroxaban, apixaban, edoxaban                                                                                                                                                                                                                                                                                                                                                                                            |

Abbreviations: CPT4, Current Procedural Terminology, version 4; GNN, generic drug name; HCPCS, Healthcare Common Procedure Coding System; NDC, National Drug Code.

## Reference

1. Cancer Research Network. Cancer therapy look-up tables (U24 CA171524). Available at: <http://www.hcsrn.org/crn/en/RESEARCH/LookupTables/>. Accessed May 15, 2018. Last updated March 2018.

| eTable 4. Univariate Analysis of Risk Factors Associated With VTE in Derivation Cohort |      |         |
|----------------------------------------------------------------------------------------|------|---------|
|                                                                                        | HR   | P Value |
| NCCN risk factors                                                                      |      |         |
| Prior VTE                                                                              | 3.20 | <.01    |
| Obesity                                                                                | 0.86 | .63     |
| Central venous catheter or pacemaker                                                   | 0.75 | .68     |
| Cardiac disease (CHF, MI, CA)                                                          | 1.00 | .98     |
| Chronic renal disease                                                                  | 1.14 | .38     |
| Diabetes                                                                               | 1.14 | .38     |
| Acute infection                                                                        | 1.42 | .20     |
| Immobilization                                                                         | 1.24 | .71     |
| General surgery or anesthesia                                                          | 1.82 | .12     |
| Trauma                                                                                 | 0.96 | .83     |
| Erythropoietin                                                                         | 0.89 | .61     |
| Blood-clotting disorders                                                               | 0.96 | .86     |
| High-dose dexamethasone, ≥480 mg                                                       | 1.09 | .55     |
| Doxorubicin <sup>a</sup>                                                               | NE   | N/A     |
| Multiagent (cytotoxic) chemotherapy                                                    | 2.05 | .48     |
| Additional risk factors considered                                                     |      |         |
| Age (every 10-y increase)                                                              | 1.23 | .04     |
| Sex (female vs male)                                                                   | 1.21 | .16     |
| Race                                                                                   |      |         |
| White                                                                                  | Ref  |         |
| Black                                                                                  | 1.33 | .13     |
| Asian                                                                                  | 0.25 | <.01    |
| Year of diagnosis (every 1-y increase)                                                 | 0.98 | .66     |
| Geography (metropolitan vs rural)                                                      | 0.92 | .67     |
| Liver disease                                                                          | 1.15 | .81     |
| Anemia                                                                                 | 0.93 | .58     |
| Hypertension                                                                           | 1.28 | .10     |
| History of bleeding                                                                    | 1.22 | .41     |
| IMiD type (lenalidomide vs thalidomide)                                                | 1.13 | .47     |
| Concurrent chemotherapy                                                                |      |         |
| Bortezomib                                                                             | 0.85 | .37     |
| Melphalan                                                                              | 1.72 | .45     |
| Cyclophosphamide                                                                       | 1.18 | .77     |

(continued)

Abbreviations: CA, cardiac arrhythmia; CHF, congestive heart failure; HR, hazard ratio; IMiD, immunomodulatory drug; MI, myocardial infarction; N/A, not applicable; NE, no event; VTE, venous thromboembolism.

<sup>a</sup>HR was not estimable for this variable because there was no VTE event in the comparison group.

<sup>b</sup>Dexamethasone was reorganized into modern conventional standard and high-dose categories.

| eTable 4. Univariate Analysis of Risk Factors Associated With VTE in Derivation Cohort (cont.) |      |         |
|------------------------------------------------------------------------------------------------|------|---------|
|                                                                                                | HR   | P Value |
| Additional risk factors considered (cont.)                                                     |      |         |
| Concurrent dexamethasone <sup>b</sup>                                                          |      |         |
| None or low dose (<120 mg/cycle)                                                               | Ref  |         |
| Standard dose (120–160 mg/cycle)                                                               | 1.27 | .13     |
| High dose (>160 mg/cycle)                                                                      | 1.42 | .06     |
| Concurrent anticoagulation                                                                     |      |         |
| None                                                                                           | Ref  |         |
| Warfarin                                                                                       | 1.09 | .69     |
| Low-molecular-weight heparin                                                                   | 0.38 | .34     |
| Direct oral anticoagulant <sup>a</sup>                                                         | NE   | N/A     |

Abbreviations: CA, cardiac arrhythmia; CHF, congestive heart failure; HR, hazard ratio; IMiD, immunomodulatory drug; MI, myocardial infarction; N/A, not applicable; NE, no event; VTE, venous thromboembolism.

<sup>a</sup>HR was not estimable for this variable because there was no VTE event in the comparison group.

<sup>b</sup>Dexamethasone was reorganized into modern conventional standard and high-dose categories.

**eTable 5. Comparison of Cohorts in SEER-Medicare Database**

|                                   | <b>IMiD Cohort<br/>(N=2,397)<br/>% (n)</b> | <b>MM Cohort<br/>(N=30,757)<br/>% (n)</b> |
|-----------------------------------|--------------------------------------------|-------------------------------------------|
| <b>Age, y</b>                     |                                            |                                           |
| <65                               | 0                                          | 26% (7,873)                               |
| 65–69                             | 25% (592)                                  | 17% (5,274)                               |
| 70–74                             | 28% (671)                                  | 17% (5,247)                               |
| 75–79                             | 23% (542)                                  | 16% (4,917)                               |
| 80–84                             | 15% (360)                                  | 13% (4,078)                               |
| ≥85                               | 10% (232)                                  | 11% (3,368)                               |
| <b>Sex</b>                        |                                            |                                           |
| Male                              | 51% (1,216)                                | 56% (17,161)                              |
| Female                            | 49% (1,181)                                | 44% (13,596)                              |
| <b>Race</b>                       |                                            |                                           |
| White                             | 80% (1,909)                                | 75% (22,987)                              |
| Black                             | 13% (303)                                  | 19% (5,878)                               |
| Asian/Pacific Islander            | 7% (146)                                   | 5% (1,486)                                |
| American Indian or Alaskan Native | 0.5% (13)                                  | 0.4% (137)                                |
| Unknown/Missing                   | 1% (26)                                    | 1% (269)                                  |
| <b>Year of diagnosis</b>          |                                            |                                           |
| <2007                             | 0                                          | 3% (1,072)                                |
| 2007                              | 8% (202)                                   | 13% (3,904)                               |
| 2008                              | 13% (311)                                  | 14% (4,142)                               |
| 2009                              | 12% (294)                                  | 14% (4,237)                               |
| 2010                              | 14% (341)                                  | 14% (4,346)                               |
| 2011                              | 15% (362)                                  | 14% (4,358)                               |
| 2012                              | 18% (419)                                  | 14% (4,401)                               |
| 2013                              | 20% (468)                                  | 14% (4,297)                               |
| <b>SEER region</b>                |                                            |                                           |
| California                        | 32% (761)                                  | 36% (11,181)                              |
| Connecticut                       | 5% (125)                                   | 5% (1,524)                                |
| Detroit                           | 5% (119)                                   | 6% (1,931)                                |
| Georgia                           | 13% (306)                                  | 13% (3,907)                               |
| Hawaii                            | 1% (25)                                    | 1% (449)                                  |
| Iowa                              | 8% (180)                                   | 4% (1,360)                                |
| Kentucky                          | 8% (180)                                   | 6% (1,768)                                |
| Louisiana                         | 6% (152)                                   | 6% (1,875)                                |
| New Jersey                        | 14% (324)                                  | 12% (3,656)                               |
| New Mexico                        | 2% (50)                                    | 2% (643)                                  |
| Seattle                           | 6% (138)                                   | 6% (1,736)                                |
| Utah                              | 2% (37)                                    | 1% (727)                                  |
| <b>Geographic region</b>          |                                            |                                           |
| Metropolitan                      | 87% (2,092)                                | 92% (28,213)                              |
| Rural                             | 13% (305)                                  | 8% (2,544)                                |

Abbreviations: IMiD, immunomodulatory drug; MM, multiple myeloma.
